# Supplementary material for: Molecular magnetic properties of heteroporphyrins: a theoretical analysis
Source: Royal Society of Chemistry journal article supplement (doi:10.1039/b709198b), 2007-01-01
Supplement: b709198b.pdf [file b709198b.pdf]

Supporting information for:

# Molecular Magnetic Properties of Heteroporphyrins: A Theoretical Analysis.

*Pablo Campomanes<sup>a</sup>, M. Isabel Menéndez<sup>a</sup>, Gloria I. Cárdenas-Jirón<sup>b\*</sup>, and Tomás L.  
Sordo<sup>a\*</sup>*

<sup>a</sup> Departamento de Química Física y Analítica, Universidad de Oviedo, C/ Julián  
Clavería, 8, 33006 Oviedo. Spain.

<sup>b</sup> Departamento de Ciencias Químicas, Facultad de Química y Biología, Universidad de  
Santiago de Chile, Casilla 40, Correo 33, Santiago. Chile.

tsordo@uniovi.es; gcardena@lauca.usach.cl

**P** ( $E_{el}=-989.551252$  h)

|   |          |           |           |
|---|----------|-----------|-----------|
| 6 | 0.000000 | 2.440953  | 2.421928  |
| 6 | 0.000000 | 2.855487  | 1.084817  |
| 6 | 0.000000 | 2.440953  | -2.421928 |
| 6 | 0.000000 | 4.257827  | -0.678156 |
| 6 | 0.000000 | 2.855487  | -1.084817 |
| 7 | 0.000000 | 2.029286  | 0.000000  |
| 6 | 0.000000 | 4.257827  | 0.678156  |
| 6 | 0.000000 | -2.440953 | -2.421928 |
| 6 | 0.000000 | 0.686032  | -4.260413 |
| 6 | 0.000000 | 1.130120  | -2.895977 |
| 6 | 0.000000 | -0.686032 | -4.260413 |
| 6 | 0.000000 | -1.130120 | -2.895977 |
| 7 | 0.000000 | 0.000000  | -2.117108 |
| 6 | 0.000000 | -2.440953 | 2.421928  |
| 6 | 0.000000 | -0.686032 | 4.260413  |
| 6 | 0.000000 | -1.130120 | 2.895977  |
| 6 | 0.000000 | 0.686032  | 4.260413  |
| 6 | 0.000000 | 1.130120  | 2.895977  |
| 7 | 0.000000 | 0.000000  | 2.117108  |
| 6 | 0.000000 | -4.257827 | 0.678156  |
| 6 | 0.000000 | -2.855487 | 1.084817  |
| 7 | 0.000000 | -2.029286 | 0.000000  |
| 6 | 0.000000 | -2.855487 | -1.084817 |
| 6 | 0.000000 | -4.257827 | -0.678156 |
| 1 | 0.000000 | -5.106481 | -1.351498 |
| 1 | 0.000000 | -5.106481 | 1.351498  |
| 1 | 0.000000 | -1.347201 | 5.116997  |
| 1 | 0.000000 | 1.347201  | 5.116997  |
| 1 | 0.000000 | 5.106481  | 1.351498  |
| 1 | 0.000000 | -1.347201 | -5.116997 |
| 1 | 0.000000 | 0.000000  | -1.101667 |
| 1 | 0.000000 | 0.000000  | 1.101667  |
| 1 | 0.000000 | -3.219588 | -3.179391 |
| 1 | 0.000000 | -3.219588 | 3.179391  |
| 1 | 0.000000 | 3.219588  | 3.179391  |
| 1 | 0.000000 | 3.219588  | -3.179391 |
| 1 | 0.000000 | 5.106481  | -1.351498 |
| 1 | 0.000000 | 1.347201  | -5.116997 |

**2OP** ( $E_{el}=-1029.2126869$  h)

|   |          |           |           |
|---|----------|-----------|-----------|
| 6 | 0.000000 | 2.401006  | 2.412014  |
| 6 | 0.000000 | 1.106213  | 2.919285  |
| 6 | 0.000000 | -2.401006 | 2.412014  |
| 6 | 0.000000 | -0.688600 | 4.274270  |
| 6 | 0.000000 | -1.106213 | 2.919285  |
| 6 | 0.000000 | 0.688600  | 4.274270  |
| 6 | 0.000000 | -2.401006 | -2.412014 |
| 6 | 0.000000 | -4.241334 | 0.676757  |
| 6 | 0.000000 | -2.824454 | 1.076333  |
| 6 | 0.000000 | -4.241334 | -0.676757 |
| 6 | 0.000000 | -2.824454 | -1.076333 |
| 7 | 0.000000 | -2.006043 | 0.000000  |
| 6 | 0.000000 | 2.401006  | -2.412014 |
| 6 | 0.000000 | 4.241334  | -0.676757 |
| 6 | 0.000000 | 2.824454  | -1.076333 |
| 6 | 0.000000 | 4.241334  | 0.676757  |
| 6 | 0.000000 | 2.824454  | 1.076333  |
| 7 | 0.000000 | 2.006043  | 0.000000  |
| 6 | 0.000000 | 0.688600  | -4.274270 |
| 6 | 0.000000 | 1.106213  | -2.919285 |
| 6 | 0.000000 | -1.106213 | -2.919285 |
| 6 | 0.000000 | -0.688600 | -4.274270 |
| 1 | 0.000000 | -1.354202 | -5.127039 |
| 1 | 0.000000 | 1.354202  | -5.127039 |
| 1 | 0.000000 | 5.090524  | -1.349987 |
| 1 | 0.000000 | 5.090524  | 1.349987  |
| 1 | 0.000000 | 1.354202  | 5.127039  |
| 1 | 0.000000 | -1.354202 | 5.127039  |
| 1 | 0.000000 | -5.090524 | -1.349987 |
| 1 | 0.000000 | -5.090524 | 1.349987  |
| 1 | 0.000000 | -3.178031 | -3.172196 |
| 1 | 0.000000 | -3.178031 | 3.172196  |
| 1 | 0.000000 | 3.178031  | 3.172196  |
| 1 | 0.000000 | 3.178031  | -3.172196 |
| 8 | 0.000000 | 0.000000  | 2.119556  |
| 8 | 0.000000 | 0.000000  | -2.119556 |

**2SP** ( $E_{el}=-1675.174353$  h)

|    |           |           |          |
|----|-----------|-----------|----------|
| 6  | -2.619359 | -2.401986 | 0.000000 |
| 6  | -1.261175 | -2.740282 | 0.000000 |
| 6  | 2.619359  | -2.401986 | 0.000000 |
| 6  | 0.689371  | -4.046987 | 0.000000 |
| 6  | 1.261175  | -2.740282 | 0.000000 |
| 6  | -0.689371 | -4.046987 | 0.000000 |
| 6  | 2.619359  | 2.401986  | 0.000000 |
| 6  | 4.534765  | -0.680408 | 0.000000 |
| 6  | 3.128299  | -1.089549 | 0.000000 |
| 6  | 4.534765  | 0.680408  | 0.000000 |
| 6  | 3.128299  | 1.089549  | 0.000000 |
| 7  | 2.324507  | 0.000000  | 0.000000 |
| 6  | -2.619359 | 2.401986  | 0.000000 |
| 6  | -4.534765 | 0.680408  | 0.000000 |
| 6  | -3.128299 | 1.089549  | 0.000000 |
| 6  | -4.534765 | -0.680408 | 0.000000 |
| 6  | -3.128299 | -1.089549 | 0.000000 |
| 7  | -2.324507 | 0.000000  | 0.000000 |
| 6  | -0.689371 | 4.046987  | 0.000000 |
| 6  | -1.261175 | 2.740282  | 0.000000 |
| 6  | 1.261175  | 2.740282  | 0.000000 |
| 6  | 0.689371  | 4.046987  | 0.000000 |
| 1  | 1.299293  | 4.945082  | 0.000000 |
| 1  | -1.299293 | 4.945082  | 0.000000 |
| 1  | -5.389758 | 1.345823  | 0.000000 |
| 1  | -5.389758 | -1.345823 | 0.000000 |
| 1  | -1.299293 | -4.945082 | 0.000000 |
| 1  | 1.299293  | -4.945082 | 0.000000 |
| 1  | 5.389758  | 1.345823  | 0.000000 |
| 1  | 5.389758  | -1.345823 | 0.000000 |
| 1  | 3.334455  | 3.222311  | 0.000000 |
| 1  | 3.334455  | -3.222311 | 0.000000 |
| 1  | -3.334455 | -3.222311 | 0.000000 |
| 1  | -3.334455 | 3.222311  | 0.000000 |
| 16 | 0.000000  | -1.524965 | 0.000000 |
| 16 | 0.000000  | 1.524965  | 0.000000 |

**2SeP** ( $E_{el}=-5677.5625721$  h)

|    |          |           |           |
|----|----------|-----------|-----------|
| 6  | 0.000000 | 2.420045  | 2.662512  |
| 6  | 0.000000 | 2.763113  | 1.308422  |
| 6  | 0.000000 | 2.420045  | -2.662512 |
| 6  | 0.000000 | 4.051644  | -0.691529 |
| 6  | 0.000000 | 2.763113  | -1.308422 |
| 6  | 0.000000 | 4.051644  | 0.691529  |
| 6  | 0.000000 | -2.420045 | -2.662512 |
| 6  | 0.000000 | 0.681519  | -4.559941 |
| 6  | 0.000000 | 1.095523  | -3.159366 |
| 6  | 0.000000 | -0.681519 | -4.559941 |
| 6  | 0.000000 | -1.095523 | -3.159366 |
| 7  | 0.000000 | 0.000000  | -2.356090 |
| 6  | 0.000000 | -2.420045 | 2.662512  |
| 6  | 0.000000 | -0.681519 | 4.559941  |
| 6  | 0.000000 | -1.095523 | 3.159366  |
| 6  | 0.000000 | 0.681519  | 4.559941  |
| 6  | 0.000000 | 1.095523  | 3.159366  |
| 7  | 0.000000 | 0.000000  | 2.356090  |
| 6  | 0.000000 | -4.051644 | 0.691529  |
| 6  | 0.000000 | -2.763113 | 1.308422  |
| 6  | 0.000000 | -2.763113 | -1.308422 |
| 6  | 0.000000 | -4.051644 | -0.691529 |
| 1  | 0.000000 | -4.966064 | -1.279000 |
| 1  | 0.000000 | -4.966064 | 1.279000  |
| 1  | 0.000000 | -1.346181 | 5.415461  |
| 1  | 0.000000 | 1.346181  | 5.415461  |
| 1  | 0.000000 | 4.966064  | 1.279000  |
| 1  | 0.000000 | 4.966064  | -1.279000 |
| 1  | 0.000000 | -1.346181 | -5.415461 |
| 1  | 0.000000 | 1.346181  | -5.415461 |
| 1  | 0.000000 | -3.227207 | -3.393698 |
| 1  | 0.000000 | 3.227207  | -3.393698 |
| 1  | 0.000000 | 3.227207  | 3.393698  |
| 1  | 0.000000 | -3.227207 | 3.393698  |
| 34 | 0.000000 | 1.427514  | 0.000000  |
| 34 | 0.000000 | -1.427514 | 0.000000  |

**TPP** ( $E_{el}=-1913.751047$  h)

|   |             |             |             |
|---|-------------|-------------|-------------|
| C | 0.01371800  | -0.00099100 | 0.17785900  |
| C | -0.16792300 | 0.01950400  | 1.57127900  |
| C | 0.98147700  | 0.00517700  | 5.00854600  |
| C | -1.14579400 | 0.07029500  | 3.62072000  |
| C | 0.27726100  | 0.02190800  | 3.79239800  |
| C | -1.41491400 | 0.06915800  | 2.27805000  |
| C | 5.76151400  | 0.26288200  | 4.05331300  |
| C | 3.06993800  | -0.09115300 | 6.42181600  |
| C | 2.38750500  | 0.02894700  | 5.13676600  |
| C | 4.39580400  | -0.02069500 | 6.15694000  |
| C | 4.51775400  | 0.14316100  | 4.71131100  |
| N | 3.28756300  | 0.15123900  | 4.11553800  |
| C | 4.79349800  | 0.25355600  | -0.77810800 |
| C | 2.72431400  | -0.03384400 | -2.19481800 |
| C | 3.39255100  | 0.13288500  | -0.90746000 |
| C | 1.39843800  | -0.10355000 | -1.92956000 |
| C | 1.26245600  | 0.02027900  | -0.48124900 |
| N | 2.48591500  | 0.14370400  | 0.11529400  |
| C | 6.90271500  | 0.52082600  | 0.61293200  |
| C | 5.49272000  | 0.32414900  | 0.43924200  |
| C | 5.93839800  | 0.32883700  | 2.66035900  |
| C | 7.17214500  | 0.52358700  | 1.95562000  |
| H | 8.13233100  | 0.66048900  | 2.42977000  |
| H | 7.60561700  | 0.65516600  | -0.19543000 |
| H | 3.21253600  | -0.10640100 | -3.15587100 |
| H | 0.58843900  | -0.24432000 | -2.63061500 |
| H | -2.38452400 | 0.11155400  | 1.80528000  |
| H | -1.85826200 | 0.11353500  | 4.43071300  |
| H | 5.21601300  | -0.09101600 | 6.85667300  |
| H | 2.59202100  | -0.23048800 | 7.38072500  |
| C | -1.22869500 | -0.04382900 | -0.65807500 |
| C | -2.07497900 | -1.16399800 | -0.63516400 |
| C | -1.57516000 | 1.03923300  | -1.48177800 |
| C | -3.23263000 | -1.20072600 | -1.41346000 |
| H | -1.81355800 | -2.01306000 | -0.00971500 |
| C | -2.73327700 | 1.00371900  | -2.25891900 |
| H | -0.93186400 | 1.91433000  | -1.50329300 |
| C | -3.56596300 | -0.11653500 | -2.22726800 |
| H | -3.87135600 | -2.07976900 | -1.38705300 |
| H | -2.98671400 | 1.85425300  | -2.88636500 |
| H | -4.46777300 | -0.14474300 | -2.83304000 |
| C | 5.61855800  | 0.31496800  | -2.02697000 |

Supplementary Material (ESI) for PCCP  
This journal is © The Owner Societies 2007

|   |             |             |             |
|---|-------------|-------------|-------------|
| C | 6.52087000  | -0.71300600 | -2.34438100 |
| C | 5.50879400  | 1.40338600  | -2.90726100 |
| C | 7.28909700  | -0.65582700 | -3.50779100 |
| H | 6.60907200  | -1.56561000 | -1.67674900 |
| C | 6.27779000  | 1.46182400  | -4.06994800 |
| H | 4.81954200  | 2.20868100  | -2.66948500 |
| C | 7.17039900  | 0.43228500  | -4.37430600 |
| H | 7.97675400  | -1.46513400 | -3.73914000 |
| H | 6.18168600  | 2.31520600  | -4.73616400 |
| H | 7.76864400  | 0.47747900  | -5.28042600 |
| C | 7.00282300  | 0.32859700  | 4.88893400  |
| C | 7.96252500  | -0.69502100 | 4.83355900  |
| C | 7.23496700  | 1.41660900  | 5.74571500  |
| C | 9.11893600  | -0.63348600 | 5.61196900  |
| H | 7.79073800  | -1.54801200 | 4.18295000  |
| C | 8.39199300  | 1.47954000  | 6.52288700  |
| H | 6.50311400  | 2.21800100  | 5.79307700  |
| C | 9.33790800  | 0.45460500  | 6.45866100  |
| H | 9.84634900  | -1.43943700 | 5.56003000  |
| H | 8.55564100  | 2.33272400  | 7.17604700  |
| H | 10.23867100 | 0.50320100  | 7.06468300  |
| C | 0.15669100  | -0.03684100 | 6.25842800  |
| C | 0.15025400  | 1.04889200  | 7.14877000  |
| C | -0.62765600 | -1.15961600 | 6.56739400  |
| C | -0.61769100 | 1.01297300  | 8.31305400  |
| H | 0.74797300  | 1.92609900  | 6.91785000  |
| C | -1.39448300 | -1.19687700 | 7.73268300  |
| H | -0.62389500 | -2.01061200 | 5.89190900  |
| C | -1.39229400 | -0.11027900 | 8.60911100  |
| H | -0.61316500 | 1.86544600  | 8.98730700  |
| H | -1.98963500 | -2.07812400 | 7.95754300  |
| H | -1.98957900 | -0.13870500 | 9.51655700  |
| N | 0.82094400  | 0.00174000  | 2.52822300  |
| H | 1.81585300  | 0.02274200  | 2.32834400  |
| N | 4.95578400  | 0.22400800  | 1.70247100  |
| H | 3.96474000  | 0.13370600  | 1.90225500  |

**2OTPP** ( $E_{el}=-1953.411962$  h)

|   |             |            |            |
|---|-------------|------------|------------|
| C | 0.03422700  | 0.00412200 | 0.21863100 |
| C | -0.17875000 | 0.13518000 | 1.59976300 |
| C | 0.98429000  | 0.00596500 | 4.96795100 |
| C | -1.12894800 | 0.38788400 | 3.62210600 |
| C | 0.25625300  | 0.13546800 | 3.77485500 |
| C | -1.39861900 | 0.38798800 | 2.27329500 |
| C | 5.74007700  | 0.26746500 | 4.01362800 |

Supplementary Material (ESI) for PCCP  
This journal is © The Owner Societies 2007

|   |             |             |             |
|---|-------------|-------------|-------------|
| C | 3.07439400  | -0.40372400 | 6.34795600  |
| C | 2.39136100  | -0.06650900 | 5.08913300  |
| C | 4.39794700  | -0.32919900 | 6.08248700  |
| C | 4.50398700  | 0.05121000  | 4.66521800  |
| N | 3.28058500  | 0.17966500  | 4.09692200  |
| C | 4.79072900  | 0.25639900  | -0.73551100 |
| C | 2.75344700  | -0.34117500 | -2.12516500 |
| C | 3.39875500  | 0.04117500  | -0.85950200 |
| C | 1.42978900  | -0.41163000 | -1.85935800 |
| C | 1.28592000  | -0.07119900 | -0.43516600 |
| N | 2.48962900  | 0.17391700  | 0.13655500  |
| C | 6.85513700  | 0.82750800  | 0.61857300  |
| C | 5.50266100  | 0.43879200  | 0.46026500  |
| C | 5.93702400  | 0.44455500  | 2.63526100  |
| C | 7.12449200  | 0.83156500  | 1.96752000  |
| H | 8.05123400  | 1.09698200  | 2.45325600  |
| H | 7.52393300  | 1.08920100  | -0.18725900 |
| H | 3.25492600  | -0.55308100 | -3.05902800 |
| H | 0.63197700  | -0.69274300 | -2.53238200 |
| H | -2.34799300 | 0.56694100  | 1.79179300  |
| H | -1.82045100 | 0.56693100  | 4.43139800  |
| H | 5.22154100  | -0.53757900 | 6.75095600  |
| H | 2.59861900  | -0.68562400 | 7.27679800  |
| C | -1.20294400 | -0.03934800 | -0.62360100 |
| C | -2.15710100 | -1.05740000 | -0.46058800 |
| C | -1.43226400 | 0.94029500  | -1.60414000 |
| C | -3.30387100 | -1.09589900 | -1.25410700 |
| H | -1.98621200 | -1.82995700 | 0.28387300  |
| C | -2.58087200 | 0.90442600  | -2.39472000 |
| H | -0.70536000 | 1.73643700  | -1.73577300 |
| C | -3.52029900 | -0.11414600 | -2.22297100 |
| H | -4.02530300 | -1.89751800 | -1.11891200 |
| H | -2.74312500 | 1.67554400  | -3.14325900 |
| H | -4.41415500 | -0.14335400 | -2.84035900 |
| C | 5.60861400  | 0.31595800  | -1.98832700 |
| C | 6.64527600  | -0.60318300 | -2.22063100 |
| C | 5.35020500  | 1.29259800  | -2.96445800 |
| C | 7.39923900  | -0.54897100 | -3.39311600 |
| H | 6.84673200  | -1.37287200 | -1.48091900 |
| C | 6.10692100  | 1.34979500  | -4.13490900 |
| H | 4.55519800  | 2.01252600  | -2.79362100 |
| C | 7.13363400  | 0.42907500  | -4.35341800 |
| H | 8.19072300  | -1.27528000 | -3.55849100 |
| H | 5.89569600  | 2.11705800  | -4.87514000 |
| H | 7.72163800  | 0.47261300  | -5.26630800 |
| C | 6.97703200  | 0.33408600  | 4.85474400  |
| C | 8.02483700  | -0.58442600 | 4.67631500  |
| C | 7.11283300  | 1.31776800  | 5.84838600  |
| C | 9.17204400  | -0.52285300 | 5.46769600  |
| H | 7.92749600  | -1.35943900 | 3.92122900  |



|   |             |             |            |
|---|-------------|-------------|------------|
| C | 8.26180700  | 1.38239300  | 6.63674100 |
| H | 6.31250800  | 2.03782200  | 5.99186100 |
| C | 9.29498800  | 0.46201700  | 6.44966400 |
| H | 9.96739600  | -1.24882000 | 5.32035800 |
| H | 8.35071000  | 2.15532200  | 7.39565300 |
| H | 10.18905800 | 0.51126800  | 7.06547400 |
| C | 0.16620200  | -0.03923200 | 6.22090100 |
| C | 0.33159800  | 0.93779000  | 7.21680900 |
| C | -0.77926100 | -1.05631200 | 6.43378200 |
| C | -0.42686100 | 0.90051800  | 8.38685700 |
| H | 1.05443600  | 1.73346100  | 7.06183700 |
| C | -1.53481900 | -1.09624500 | 7.60581700 |
| H | -0.90794500 | -1.82667600 | 5.67866400 |
| C | -1.36257100 | -0.11656900 | 8.58557100 |
| H | -0.28868000 | 1.66969300  | 9.14220300 |
| H | -2.25415700 | -1.89717000 | 7.75548900 |
| H | -1.95202500 | -0.14653600 | 9.49806200 |
| O | 0.81564400  | 0.00486000  | 2.53200200 |
| O | 4.96017600  | 0.23047500  | 1.70003600 |

**2STPP** ( $E_{el}=-2599.383385$  h)

|   |             |             |             |
|---|-------------|-------------|-------------|
| C | -2.39418500 | 2.66785000  | -0.00439100 |
| C | -2.72727800 | 1.29518500  | 0.01825700  |
| C | -2.44930000 | -2.61709900 | -0.01138400 |
| C | -4.04111300 | -0.64668400 | 0.16388500  |
| C | -2.75388500 | -1.23774300 | 0.01337000  |
| C | -4.02657000 | 0.73073300  | 0.16737800  |
| C | 2.39418500  | -2.66785000 | -0.00439100 |
| C | -0.72651100 | -4.52606600 | -0.16344600 |
| C | -1.12311600 | -3.12223900 | -0.03805900 |
| C | 0.63258500  | -4.54022500 | -0.16158900 |
| C | 1.05798000  | -3.14508100 | -0.03527300 |
| N | -0.02414900 | -2.33030200 | 0.02388400  |
| C | 2.44930000  | 2.61709900  | -0.01138400 |
| C | 0.72651100  | 4.52606600  | -0.16344600 |
| C | 1.12311600  | 3.12223900  | -0.03805900 |
| C | -0.63258500 | 4.54022500  | -0.16158900 |
| C | -1.05798000 | 3.14508100  | -0.03527300 |
| N | 0.02414900  | 2.33030200  | 0.02388400  |
| C | 4.04111300  | 0.64668400  | 0.16388500  |
| C | 2.75388500  | 1.23774300  | 0.01337000  |
| C | 2.72727800  | -1.29518500 | 0.01825700  |
| C | 4.02657000  | -0.73073300 | 0.16737800  |
| H | 4.91315800  | -1.34016500 | 0.29292900  |
| H | 4.94042900  | 1.23769700  | 0.28742500  |

Supplementary Material (ESI) for PCCP  
This journal is © The Owner Societies 2007

|   |             |             |             |
|---|-------------|-------------|-------------|
| H | 1.39445100  | 5.37037000  | -0.26374400 |
| H | -1.28347600 | 5.39805400  | -0.25902200 |
| H | -4.91315800 | 1.34016500  | 0.29292900  |
| H | -4.94042900 | -1.23769700 | 0.28742500  |
| H | 1.28347600  | -5.39805400 | -0.25902200 |
| H | -1.39445100 | -5.37037000 | -0.26374400 |
| S | -1.52910000 | 0.01601400  | -0.08858800 |
| S | 1.52910000  | -0.01601400 | -0.08858800 |
| C | -3.50517400 | 3.66631700  | 0.01293500  |
| C | -4.46804900 | 3.69169800  | -1.01000500 |
| C | -3.60967000 | 4.60475200  | 1.05325800  |
| C | -5.50183400 | 4.62788200  | -0.99418600 |
| H | -4.39175600 | 2.98084600  | -1.82788400 |
| C | -4.64634700 | 5.53798300  | 1.07068100  |
| H | -2.87818800 | 4.58902800  | 1.85597400  |
| C | -5.59545000 | 5.55342800  | 0.04692100  |
| H | -6.23165100 | 4.63691500  | -1.79951100 |
| H | -4.71393600 | 6.25122300  | 1.88796400  |
| H | -6.40178100 | 6.28182600  | 0.05996500  |
| C | 3.58105600  | 3.59171600  | -0.00255800 |
| C | 4.54235400  | 3.58943900  | -1.02740800 |
| C | 3.70728100  | 4.53520700  | 1.03082200  |
| C | 5.59545000  | 4.50389700  | -1.02024500 |
| H | 4.44805000  | 2.87578500  | -1.84092000 |
| C | 4.76335200  | 5.44655100  | 1.03963800  |
| H | 2.97839100  | 4.53932800  | 1.83604900  |
| C | 5.71046300  | 5.43473400  | 0.01402300  |
| H | 6.32340500  | 4.49231800  | -1.82723000 |
| H | 4.84796500  | 6.16353100  | 1.85206000  |
| H | 6.53201900  | 6.14600500  | 0.02041500  |
| C | 3.50517400  | -3.66631700 | 0.01293500  |
| C | 4.46804900  | -3.69169800 | -1.01000500 |
| C | 3.60967000  | -4.60475200 | 1.05325800  |
| C | 5.50183400  | -4.62788200 | -0.99418600 |
| H | 4.39175600  | -2.98084600 | -1.82788400 |
| C | 4.64634700  | -5.53798300 | 1.07068100  |
| H | 2.87818800  | -4.58902800 | 1.85597400  |
| C | 5.59545000  | -5.55342800 | 0.04692100  |
| H | 6.23165100  | -4.63691500 | -1.79951100 |
| H | 4.71393600  | -6.25122300 | 1.88796400  |
| H | 6.40178100  | -6.28182600 | 0.05996500  |
| C | -3.58105600 | -3.59171600 | -0.00255800 |
| C | -3.70728100 | -4.53520700 | 1.03082200  |
| C | -4.54235400 | -3.58943900 | -1.02740800 |
| C | -4.76335200 | -5.44655100 | 1.03963800  |
| H | -2.97839100 | -4.53932800 | 1.83604900  |
| C | -5.59545000 | -4.50389700 | -1.02024500 |
| H | -4.44805000 | -2.87578500 | -1.84092000 |
| C | -5.71046300 | -5.43473400 | 0.01402300  |
| H | -4.84796500 | -6.16353100 | 1.85206000  |

|   |             |             |             |
|---|-------------|-------------|-------------|
| H | -6.32340500 | -4.49231800 | -1.82723000 |
| H | -6.53201900 | -6.14600500 | 0.02041500  |

**2SeTPP** ( $E_{el}=-6601.776141$  h)

|   |             |             |             |
|---|-------------|-------------|-------------|
| C | 3.47741000  | 1.03476600  | -0.01078600 |
| C | 2.37912900  | 1.91702200  | -0.00444400 |
| C | -1.36279800 | 3.36216900  | -0.00984800 |
| C | 1.12684600  | 3.93749400  | 0.11792900  |
| C | 0.01211600  | 3.05516600  | -0.00391600 |
| C | 2.37231700  | 3.33862700  | 0.11761400  |
| C | -3.47741000 | -1.03476600 | -0.01078600 |
| C | -3.81773000 | 2.59117400  | -0.12824100 |
| C | -2.37912900 | 2.36125800  | -0.03488900 |
| C | -4.40776400 | 1.36432400  | -0.12870200 |
| C | -3.33007800 | 0.38402100  | -0.03537400 |
| N | -2.13008900 | 1.02418900  | 0.00403300  |
| C | 1.36279800  | -3.36216900 | -0.00984800 |
| C | 3.81773000  | -2.59117400 | -0.12824100 |
| C | 2.37912900  | -2.36125800 | -0.03488900 |
| C | 4.40776400  | -1.36432400 | -0.12870200 |
| C | 3.33007800  | -0.38402100 | -0.03537400 |
| N | 2.13008900  | -1.02418900 | 0.00403300  |
| C | -1.12684600 | -3.93749400 | 0.11792900  |
| C | -0.01211600 | -3.05516600 | -0.00391600 |
| C | -2.37912900 | -1.91702200 | -0.00444400 |
| C | -2.37231700 | -3.33862700 | 0.11761400  |
| H | -3.28932100 | -3.90748800 | 0.22657700  |
| H | -0.99864200 | -5.00895400 | 0.22710700  |
| H | 4.30310200  | -3.55418200 | -0.20459500 |
| H | 5.46305400  | -1.14234900 | -0.20546600 |
| H | 3.28932100  | 3.90748800  | 0.22657700  |
| H | 0.99864200  | 5.00895400  | 0.22710700  |
| H | -5.46305400 | 1.14234900  | -0.20546600 |
| H | -4.30310200 | 3.55418200  | -0.20459500 |
| C | 4.85560600  | 1.60767600  | 0.01871700  |
| C | 5.29445500  | 2.47356600  | -0.99703400 |
| C | 5.74209800  | 1.29934700  | 1.06420200  |
| C | 6.58141900  | 3.01058300  | -0.97057900 |
| H | 4.62403200  | 2.70977700  | -1.81840700 |
| C | 7.02761200  | 1.84000500  | 1.09200200  |
| H | 5.41120000  | 0.64200000  | 1.86295400  |
| C | 7.45221800  | 2.69646700  | 0.07447700  |
| H | 6.90519400  | 3.67104400  | -1.77069900 |

Supplementary Material (ESI) for PCCP  
This journal is © The Owner Societies 2007

|    |             |             |             |
|----|-------------|-------------|-------------|
| H  | 7.69630700  | 1.59470500  | 1.91292100  |
| H  | 8.45440400  | 3.11604900  | 0.09585800  |
| C  | 1.77583300  | -4.79636200 | 0.02056500  |
| C  | 1.37258600  | -5.68084500 | -0.99393100 |
| C  | 2.57111400  | -5.29527400 | 1.06583900  |
| C  | 1.75674500  | -7.02137800 | -0.96649100 |
| H  | 0.76869000  | -5.30551900 | -1.81512200 |
| C  | 2.95155700  | -6.63693300 | 1.09461400  |
| H  | 2.87858200  | -4.62558300 | 1.86369100  |
| C  | 2.54680600  | -7.50438600 | 0.07830700  |
| H  | 1.44228700  | -7.68746500 | -1.76566300 |
| H  | 3.56143800  | -7.00525500 | 1.91535600  |
| H  | 2.84488300  | -8.54915600 | 0.10043300  |
| C  | -4.85560600 | -1.60767600 | 0.01871700  |
| C  | -5.29445500 | -2.47356600 | -0.99703400 |
| C  | -5.74209800 | -1.29934700 | 1.06420200  |
| C  | -6.58141900 | -3.01058300 | -0.97057900 |
| H  | -4.62403200 | -2.70977700 | -1.81840700 |
| C  | -7.02761200 | -1.84000500 | 1.09200200  |
| H  | -5.41120000 | -0.64200000 | 1.86295400  |
| C  | -7.45221800 | -2.69646700 | 0.07447700  |
| H  | -6.90519400 | -3.67104400 | -1.77069900 |
| H  | -7.69630700 | -1.59470500 | 1.91292100  |
| H  | -8.45440400 | -3.11604900 | 0.09585800  |
| C  | -1.77583300 | 4.79636200  | 0.02056500  |
| C  | -2.57111400 | 5.29527400  | 1.06583900  |
| C  | -1.37258600 | 5.68084500  | -0.99393100 |
| C  | -2.95155700 | 6.63693300  | 1.09461400  |
| H  | -2.87858200 | 4.62558300  | 1.86369100  |
| C  | -1.75674500 | 7.02137800  | -0.96649100 |
| H  | -0.76869000 | 5.30551900  | -1.81512200 |
| C  | -2.54680600 | 7.50438600  | 0.07830700  |
| H  | -3.56143800 | 7.00525500  | 1.91535600  |
| H  | -1.44228700 | 7.68746500  | -1.76566300 |
| H  | -2.84488300 | 8.54915600  | 0.10043300  |
| Se | 0.61887200  | 1.28662800  | -0.10039400 |
| Se | -0.61887200 | -1.28662800 | -0.10039400 |

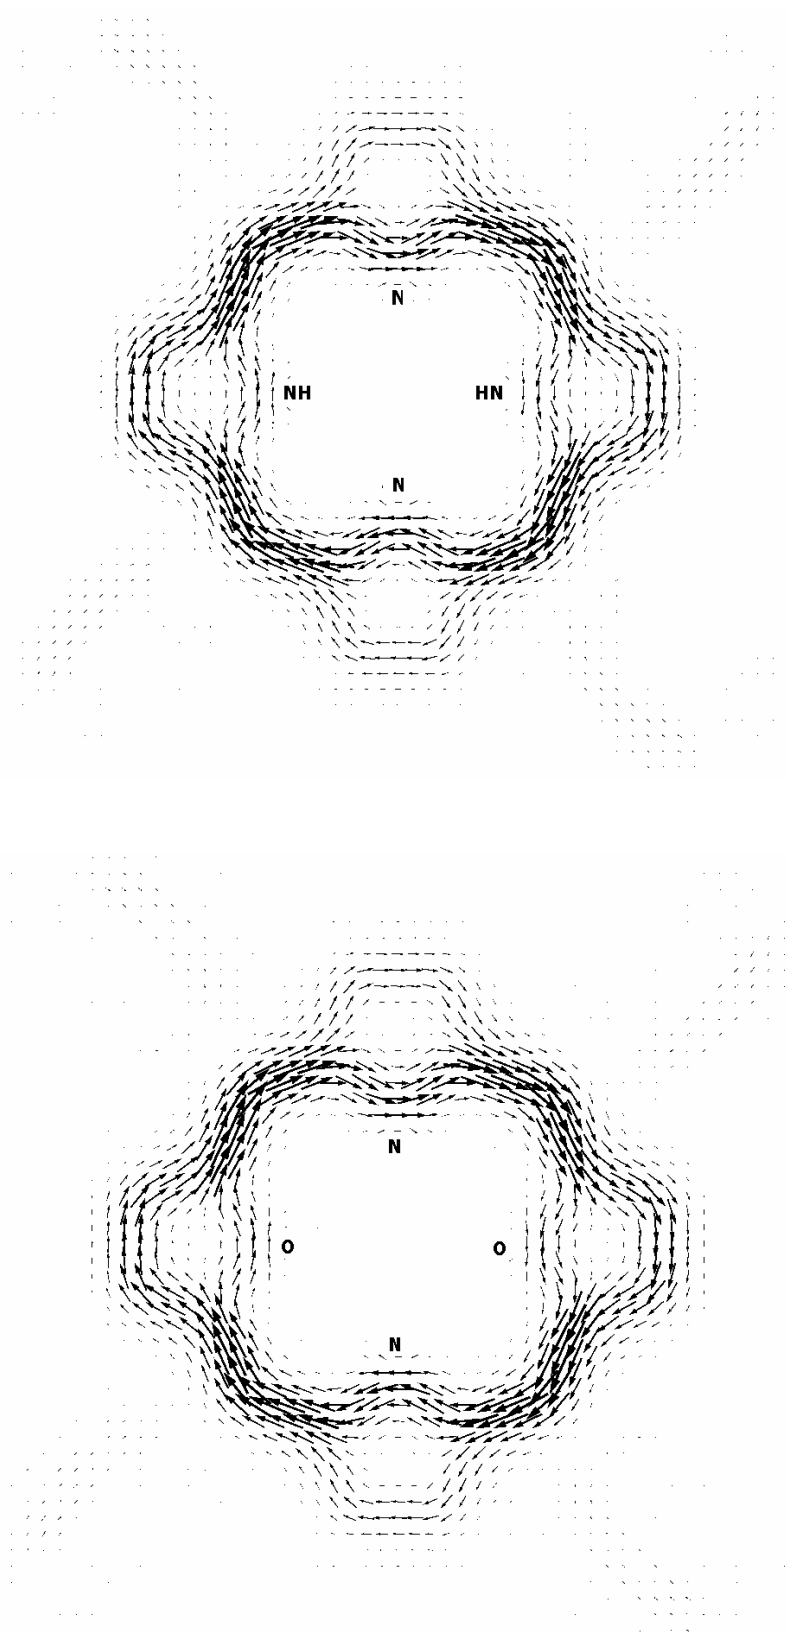

**Figure 1S:** Current density maps for the  $\pi$  electron distribution of **TPP** and **2OTPP**

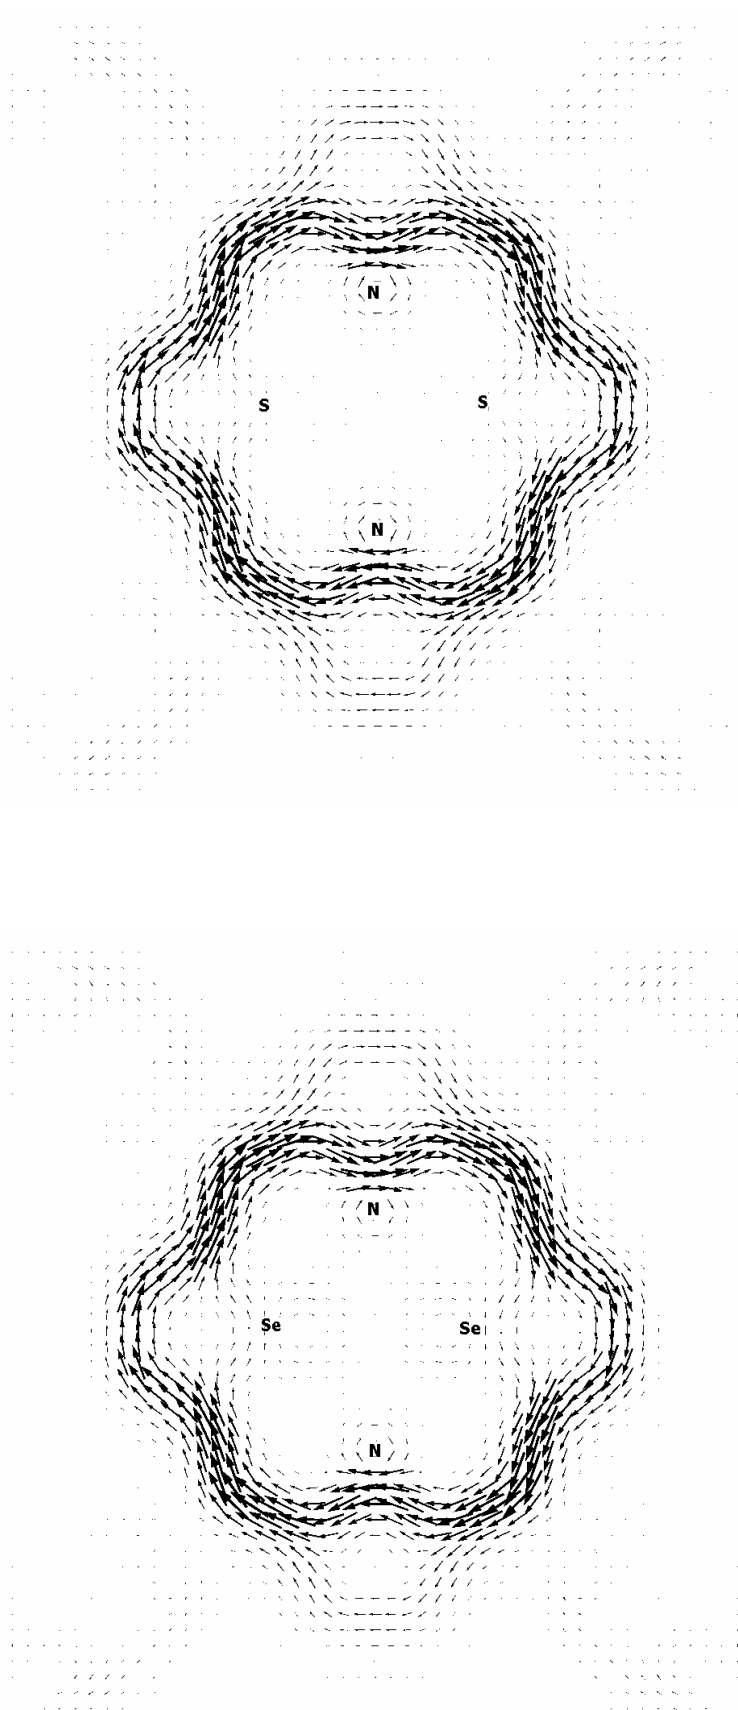

**Figure 2S:** Current density maps for the  $\pi$  electron distribution of **2STPP** and **2SeTPP**
